# Supplementary material
Source: publisher figshare collection journal article supplement (https://acs.figshare.com/ndownloader/files/20046194)
Supplement: Supplementary file 1 [file 20046194]

# Supporting Information

## **Ash and alkali poisoning mechanisms for commercial vanadium-titanic-based catalysts**

Yangyang Guo<sup>a, c</sup>, Lei Luo<sup>a</sup>, Bailong Mu<sup>a</sup>, Jian Wang<sup>a</sup>, Tingyu Zhu<sup>a, b, c1</sup>

<sup>a</sup>Beijing Engineering Research Center of Process Pollution Control, National Engineering Laboratory for Hydrometallurgical Cleaner Production Technology, Institute of Process Engineering, Chinese Academy of Sciences, Beijing 100190, China

<sup>b</sup>Center for Excellence in Regional Atmospheric Environment, Institute of Urban Environment, Chinese Academy of Sciences, Xiamen 361021, China

<sup>c</sup>National Engineering Laboratory for Flue Gas Pollutants Control Technology and Equipment, Tsinghua University, Beijing 100084, China

---

<sup>1</sup> Corresponding author. Tel./fax: +86-10-82544821;

E-mail address: tyzhu@ipe.ac.cn (T. Zhu)

## 1. Effect of H<sub>2</sub>O vapor and SO<sub>2</sub> coexistence on SCR and M-SCR catalysts

Moreover, the effect of H<sub>2</sub>O vapor and SO<sub>2</sub> coexistence on the SCR and M-SCR catalysts were performed, and the results were shown in Figure S1. As shown in Figure S1, the introduction of H<sub>2</sub>O vapor and SO<sub>2</sub> simultaneously makes NO conversion a decreased by about 9% and 10% over SCR and SCR-ash catalysts, respectively. And M-SCR and M-SCR-ash catalysts decreased by about 11% and 12%, respectively. However, when cut off the H<sub>2</sub>O vapor and SO<sub>2</sub>, the NO conversion of catalysts significantly rebounded. This phenomenon was the same as single effect of H<sub>2</sub>O vapor and the effect was reversible. In addition, the effect of H<sub>2</sub>O vapor and SO<sub>2</sub> coexistence on the catalysts became slight compared with single effect of H<sub>2</sub>O vapor, indicating the promotion effect of SO<sub>2</sub> also occurred in this system.

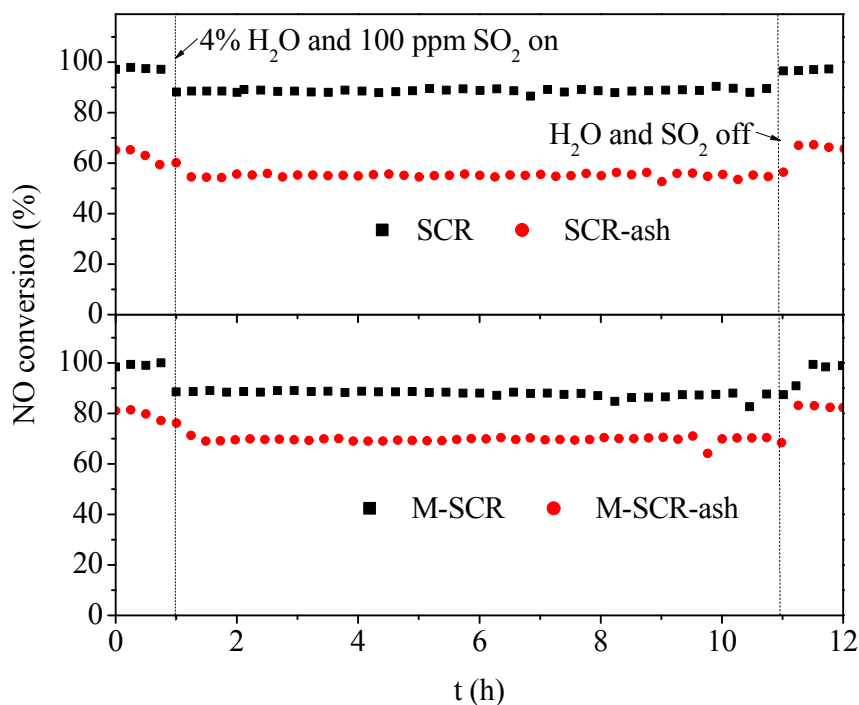

Figure S1. Effect of H<sub>2</sub>O vapor and SO<sub>2</sub> coexistence on the SCR and M-SCR catalysts
